# Supplementary material for: MnO2/TiN heterogeneous nanostructure design for electrochemical energy storage
Source: Royal Society of Chemistry journal article supplement (doi:10.1039/c1cp21815h), 2011-01-01
Supplement: c1cp21815h.doc [file c1cp21815h.doc]

Supplementary Material (ESI) for *Phys. Chem. Chem. Phys.*

This Journal is © The Owner Societies 2011

Supporting Information

**MnO2/TiN Heterogeneous Nanostructure Design for**

**Electrochemical Energy Storage**

Stefanie A. Sherrill, Jonathon Duay, Zhe Gui, Parag Banerjee, Gary W. Rubloff, Sang Bok Lee

Department of Chemistry and Biochemistry, University of Maryland, College Park, Maryland 20742

Department of Materials Science and Engineering, University of Maryland, College Park, Maryland 20742

Graduate School of Nanoscience and Technology (WCU), Korea Advanced Institute of Science and Technology, Daejeon, Korea 305-701, Korea

Supplementary Material (ESI) for *Phys. Chem. Chem. Phys.*

This Journal is © the Owners Societies 2011


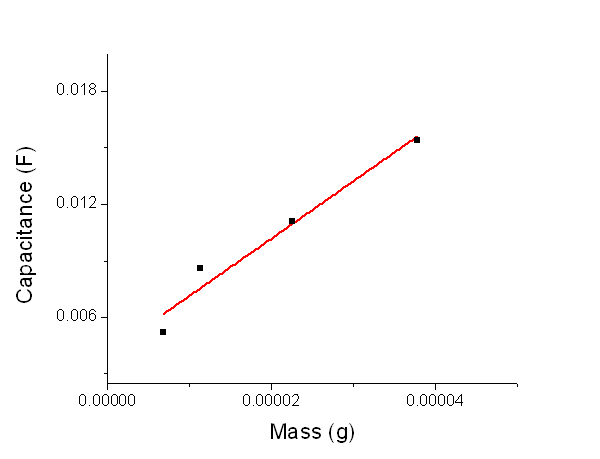


Figure S1 Linear fit of results from depositing various amounts of MnO2 into the TiN nanotubes. We found that the capacitance results varied for given amount of MnO2 deposited. This figure shows capacitance calculated versus mass deposited. The red curve is the linear fit to the given data points.

Supplementary Material (ESI) for *Phys. Chem. Chem. Phys.*

This Journal is © the Owners Societies 2011


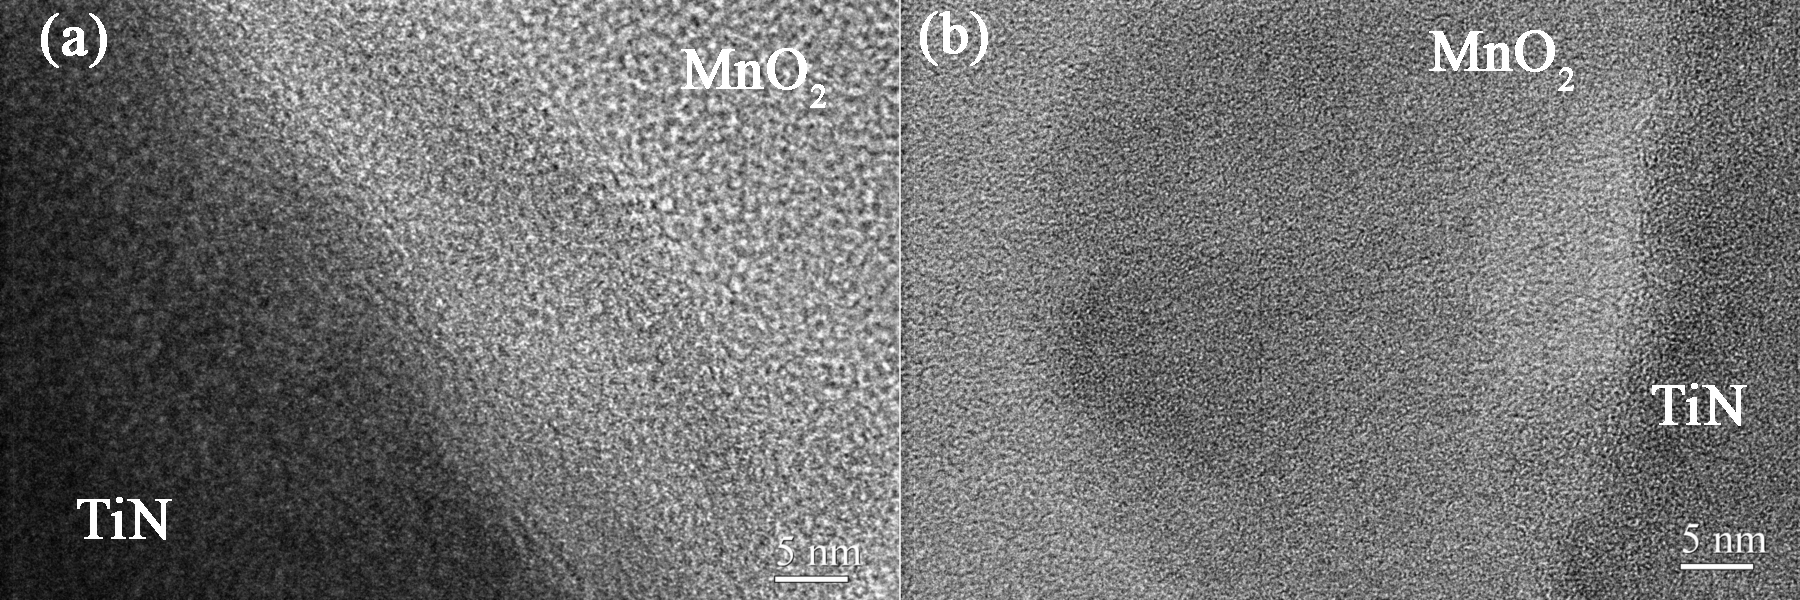


Figure S2 (a,b) High resolution transmission electron microscope (HR-TEM) images of the MnO2/TiN nanotube nanostructure. The images show the amorphous material of both MnO2 and TiN.

Supplementary Material (ESI) for *Phys. Chem. Chem. Phys.*

This Journal is © the Owners Societies 2011


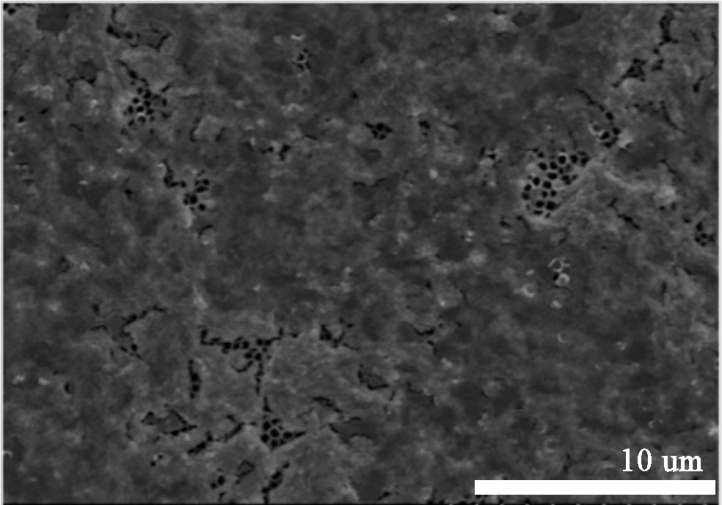


Figure S3 SEM top view of excessive MnO2 deposited onto the TiN nanotubes. This figure illustrates with SEM the result that occurs when an excessive amount of MnO2 is deposited onto the TiN nanotubes. We believe that when this results occurs, that the capacitance capabilities of the system are limited as the MnO2 does not reach into the pores.

Supplementary Material (ESI) for *Phys. Chem. Chem. Phys.*

This Journal is © the Owners Societies 2011


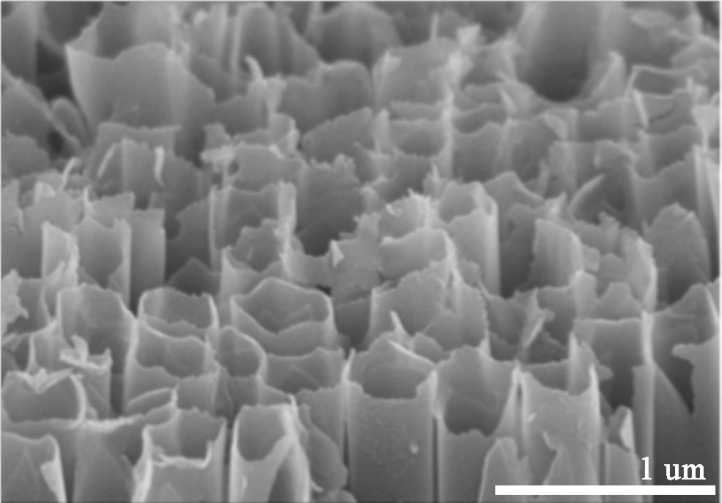


Figure S4: SEM top view of TiN nanotubes after GV cycling at 0.1 mA for 1000 cycles. illustrates the thin nature of the TiN nanotubes at the top. We believe that because the TiN nanotubes are only a few nanometers thick at the top and this contributes to the decrease in specific capacitance at greater current densities. The cracking at the top of the nanotubes leads to a breakdown in the structure at higher current densities. The SEM image provided shows the TiN nanotubes after GV cycling of 1000 cycles at 0.1 mA.
